# Supplementary material
Source: PubMed Central journal article supplement (PMC2752603)
Supplement: 0904535106_0904535106SI.pdf [file 0904535106_0904535106SI.pdf]

# Supporting Information

Smith et al. 10.1073/pnas.0904535106

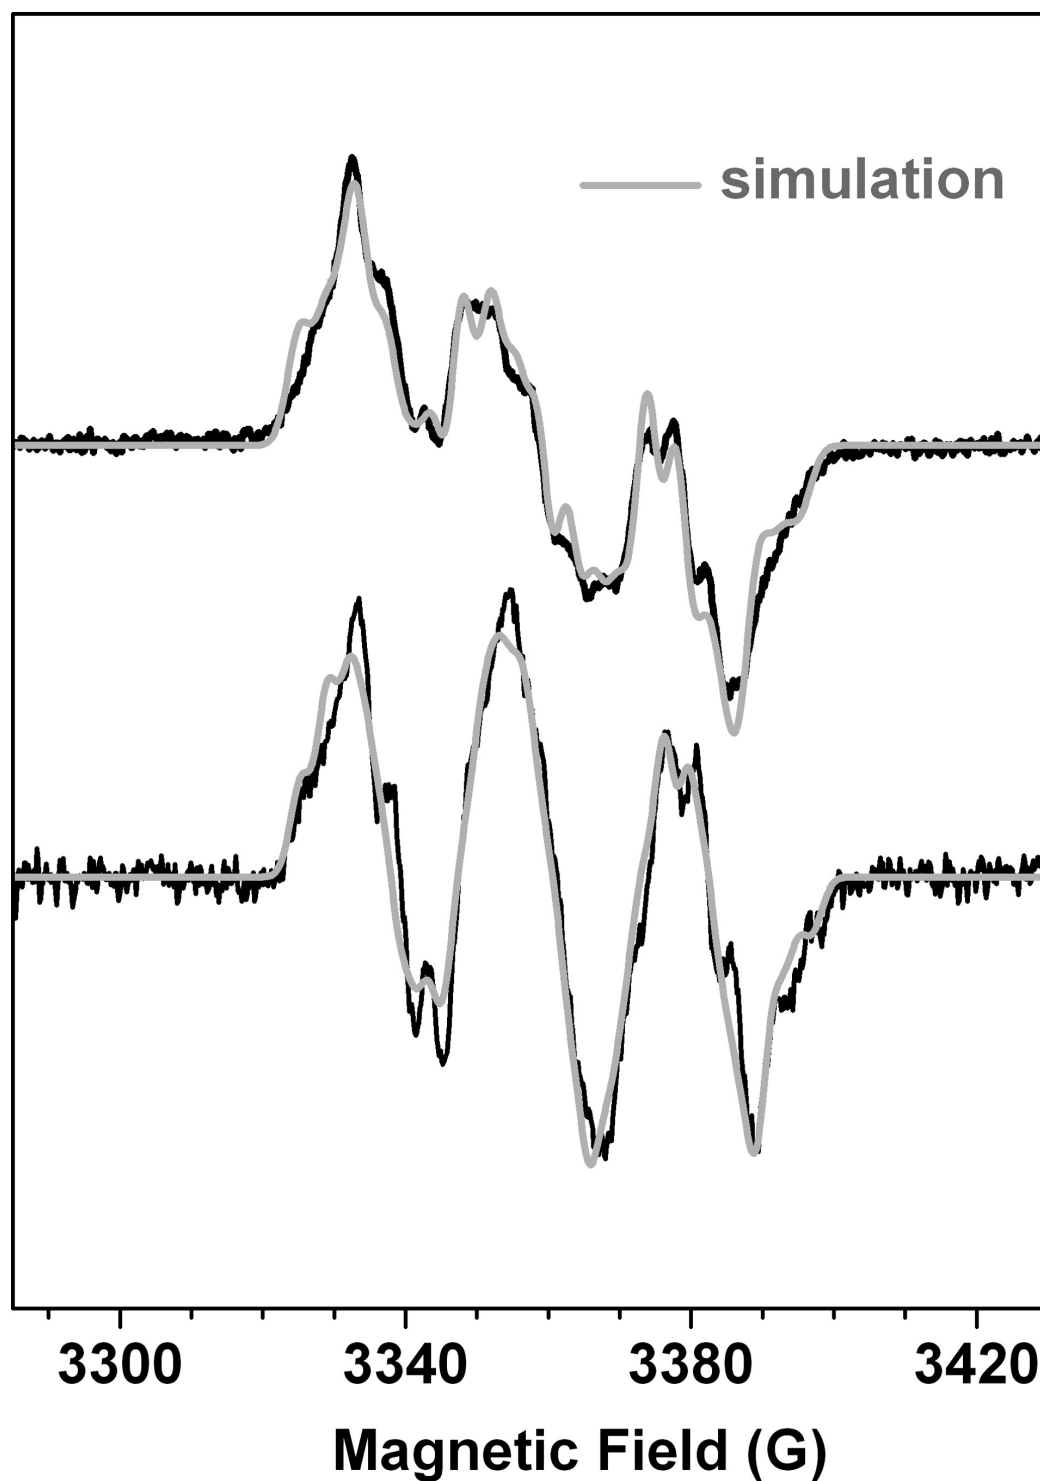

**Fig. S1.** Simulations (gray traces) of the 9-GHz EPR spectra of the Trp\* formed on reaction of the D179W+R258E+R272D variant of CiP and the E250+E168Q variant of lignin peroxidase (LiP) with 5-fold excess hydrogen peroxide. Simulations were performed by using the "esfit" routine of the EasySpin simulation package with Perturbation option enabled [Stoll S, Schweiger A (2006) EasySpin, a comprehensive software package for spectral simulation and analysis in EPR *J Magn Reson* 178:42–55].

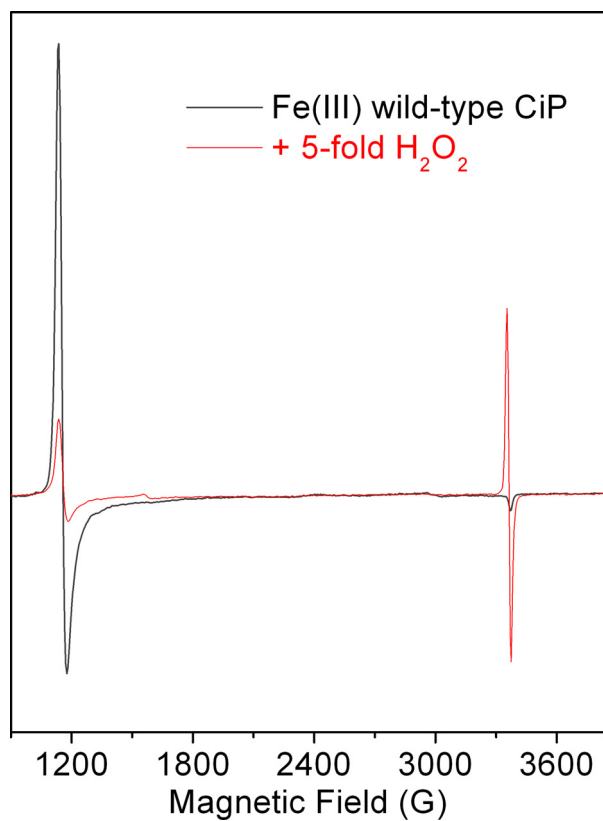

**Fig. S2.** The 9-GHz EPR spectra of *Coprinus cinereus* peroxidase (CiP) (WT) in the resting state (black trace) and on reaction with 5-fold excess hydrogen peroxide (gray trace). Experimental conditions: 4 K; modulation amplitude, 2 G; modulation frequency, 100 kHz. The dramatic decrease of the ferric EPR signal (75%) with the concomitant appearance of a low proportion of a Tyr\* signal (red trace) implied the formation of the EPR-silent [Fe(IV)=O] intermediate.

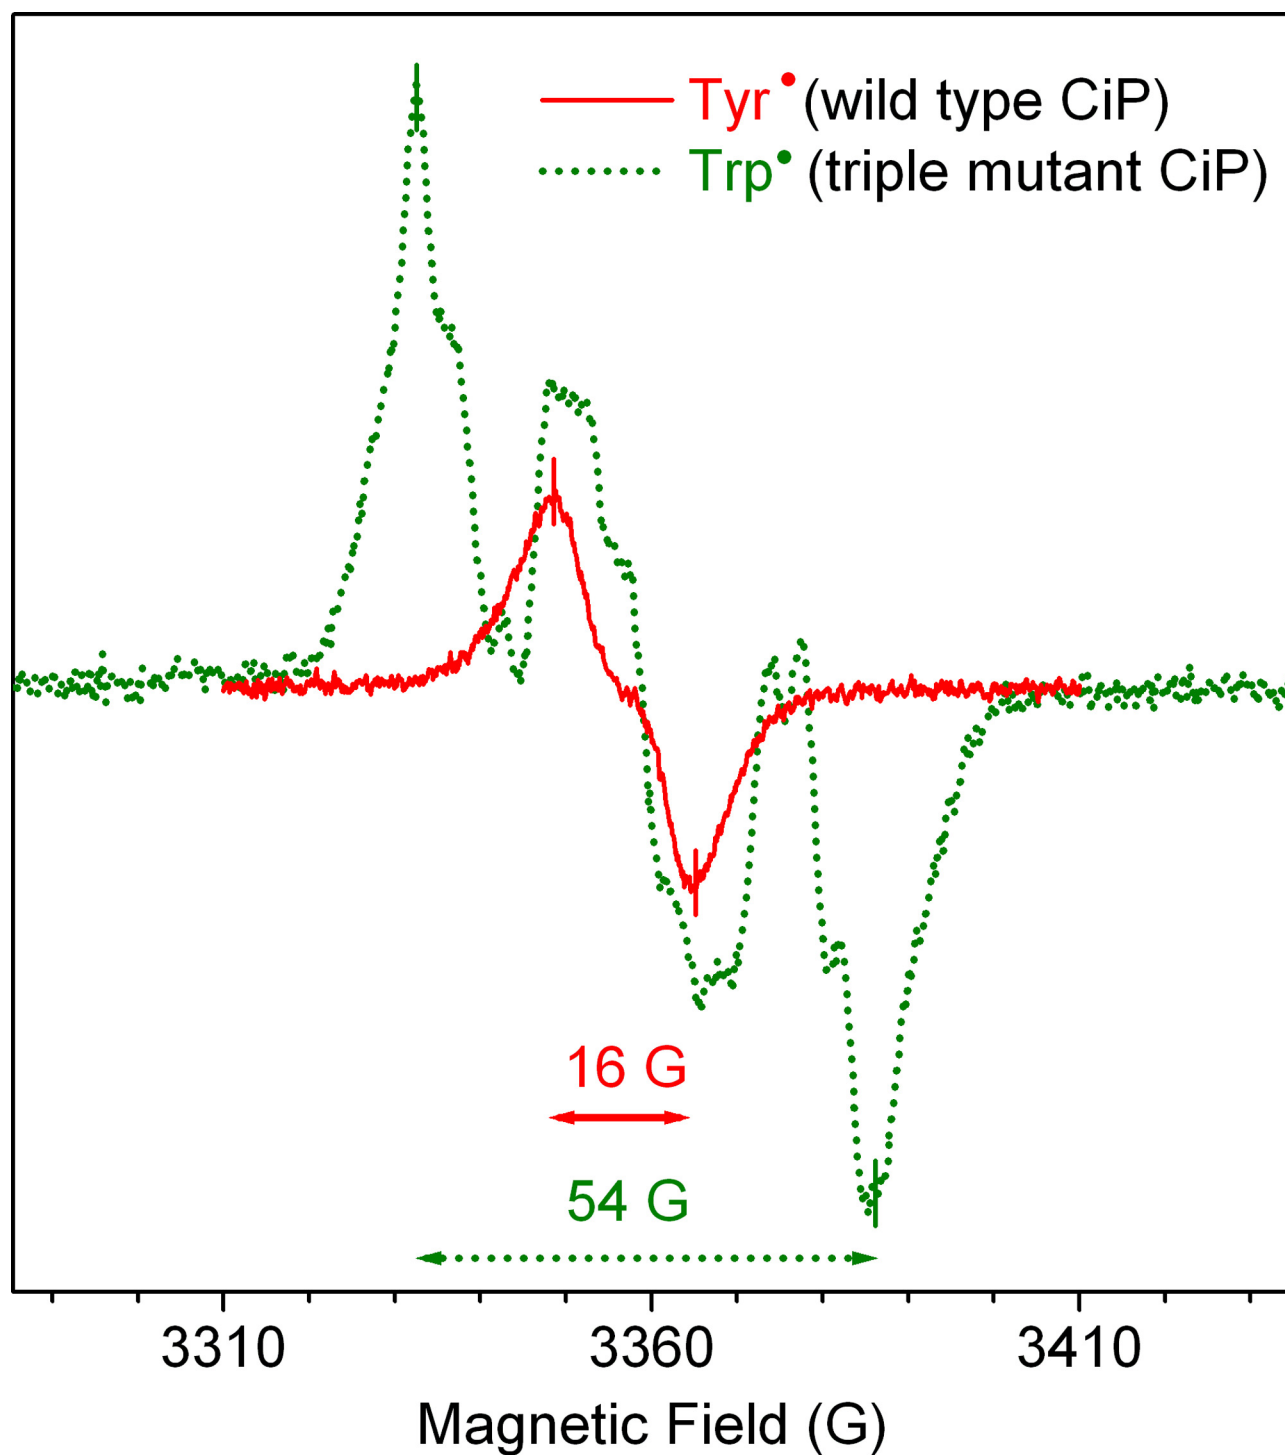

**Fig. S3.** Comparison of the Trp<sup>•</sup> (green trace) and the Tyr<sup>•</sup> (red trace) formed on reaction with 5-fold excess H<sub>2</sub>O<sub>2</sub> of the D179W+R258E+R272D variant and the WT CiPs, respectively. Spin quantification showed that the Tyr<sup>•</sup> yield in the WT enzyme represented only 10% of the Trp<sup>•</sup> in the triple variant. Experimental conditions: 40 K; modulation amplitude, 1 G; modulation frequency, 100 kHz.

## Other Supporting Information Files

[Table S1 \(PDF\)](#)
